# Supplementary material for: Evaluation of the Role of Circulating Tumor Cells and Microsatellite Instability Status in Predicting Outcome of Advanced CRC Patients
Source: PubMed Central journal article supplement (PMC7712177; doi:10.3390/jpm10040235), 2020-11-18
Supplement: jpm-10-00235-s001.pdf [file jpm-10-00235-s001.pdf]

| Patients | Gender | DOB       | Age  | Age_1 | PS_1 | Stage | CEA+/EpCAM+ |
|----------|--------|-----------|------|-------|------|-------|-------------|
| 1        | Male   | 1939/7/1  | 71.5 | >70   | 0-1  | IV    | 0           |
| 2        | Female | 1949/7/1  | 60.8 | <=70  | 0-1  | IV    | 0           |
| 3        | Female | 1936/7/1  | 76.7 | >70   | 0-1  | IV    | 0           |
| 4        | Female | 1948/7/1  | 62.9 | <=70  | >=2  | IV    | 0           |
| 5        | Male   | 1941/7/1  | 71   | >70   | 0-1  | IV    | 14          |
| 6        | Female | 1957/7/1  | 55.6 | <=70  | 0-1  | IV    | 18          |
| 7        | Female | 1954/7/1  | 58.2 | <=70  | 0-1  | IV    | 20          |
| 8        | Male   | 1952/7/19 | 56.1 | <=70  | 0-1  | IV    | 0           |
| 9        | Male   | 1941/7/1  | 66.5 | <=70  | 0-1  | IV    | 0           |
| 10       | Male   | 1964/1/1  | 46   | <=70  | 0-1  | IV    | 2           |
| 11       | Female | 1969/7/1  | 44.4 | <=70  | 0-1  | IV    | 3           |
| 12       | Male   | 1938/7/1  | 75.1 | >70   | 0-1  | IV    | 0           |
| 13       | Male   | 1939/7/1  | 68.5 | <=70  | 0-1  | IV    | 2           |
| 14       | Female | 1933/7/1  | 75.1 | >70   | 0-1  | IV    | 4           |
| 15       | Female | 1954/7/1  | 55   | <=70  | 0-1  | IV    | 0           |
| 16       | Male   | 1947/7/1  | 61.6 | <=70  | 0-1  | IV    | 0           |
| 17       | Male   | 1937/7/1  | 75.2 | >70   | 0-1  | IV    | 1           |
| 18       | Male   | 1948/7/1  | 64   | <=70  | 0-1  | IV    | 1           |
| 19       | Female | 1940/7/1  | 70.5 | >70   | 0-1  | IV    | 0           |
| 20       | Male   | 1945/7/1  | 66.2 | <=70  | 0-1  | IV    | 1           |
| 21       | Female | 1957/7/1  | 54.6 | <=70  | 0-1  | IV    | 0           |
| 22       | Female | 1932/7/1  | 75.3 | >70   | 0-1  | IV    | 2           |
| 23       | Male   | 1930/1/1  | 77.9 | >70   | >=2  | IV    | 0           |
| 24       | Male   | 1932/7/1  | 76.6 | >70   | 0-1  | IV    | 0           |
| 25       | Male   | 1945/7/1  | 64.5 | <=70  | >=2  | IV    | 0           |
| 26       | Female | 1952/7/1  | 56.6 | <=70  | 0-1  | IV    | 1           |
| 27       | Male   | 1932/7/1  | 80   | >70   | 0-1  | IV    | 0           |
| 28       | Male   | 1940/7/1  | 70.7 | >70   | 0-1  | IV    | 3           |
| 29       | Female | 1943/7/1  | 67.7 | <=70  | 0-1  | IV    | 0           |
| 30       | Female | 1954/7/1  | 58.5 | <=70  | 0-1  | IV    | 0           |
| 31       | Female | 1938/7/1  | 75   | >70   | 0-1  | IV    | 1           |
| 32       | Male   | 1967/7/1  | 40.6 | <=70  | >=2  | IV    | 0           |
| 33       | Male   | 1945/7/1  | 65.1 | <=70  | 0-1  | IV    | 0           |
| 34       | Male   | 1924/7/1  | 88.1 | >70   | 0-1  | IV    | 0           |
| 35       | Male   | 1930/1/1  | 79.8 | >70   | 0-1  | IV    | 0           |
| 36       | Male   | 1925/7/1  | 84   | >70   | >=2  | IV    | 0           |
| 37       | Female | 1930/7/1  | 78.9 | >70   | 0-1  | IV    | 0           |
| 38       | Male   | 1976/7/1  | 31.9 | <=70  | 0-1  | IV    | 0           |
| 39       | Male   | 1933/7/1  | 69.2 | <=70  | 0-1  | IV    | 0           |
| 40       | Female | 1952/7/1  | 55.7 | <=70  | 0-1  | IV    | 0           |
| 41       | Female | 1973/7/1  | 36.3 | <=70  | 0-1  | IV    | 0           |
| 42       | Female | 1949/7/1  | 61   | <=70  | 0-1  | IV    | 0           |
| 43       | Male   | 1943/7/1  | 68.4 | <=70  | 0-1  | IV    | 0           |
| 44       | Male   | 1940/7/1  | 70.2 | >70   | 0-1  | IV    | 0           |
| 45       | Female | 1961/6/20 | 50.1 | <=70  | 0-1  | IV    | 15          |
| 46       | Male   | 1929/7/1  | 82.7 | >70   | 0-1  | IV    | 2           |
| 47       | Male   | 1940/7/1  | 72.4 | >70   | 0-1  | IV    | 3           |
| 48       | Male   | 1957/7/1  | 52.7 | <=70  | 0-1  | IV    | 0           |
| 49       | Male   | 1934/7/1  | 73.6 | >70   | 0-1  | IV    | 2           |

|    |        |            |      |      |     |    |   |
|----|--------|------------|------|------|-----|----|---|
| 50 | Female | 1949/7/1   | 63   | <=70 | 0-1 | IV | 3 |
| 51 | Male   | 1931/7/1   | 81.3 | >70  | 0-1 | IV | 0 |
| 52 | Female | 1961/7/1   | 49   | <=70 | 0-1 | IV | 0 |
| 53 | Male   | 1935/7/1   | 76.1 | >70  | 0-1 | IV | 9 |
| 54 | Male   | 1991/7/1   | 20.4 | <=70 | 0-1 | IV | 0 |
| 55 | Male   | 1933/7/1   | 79.7 | >70  | 0-1 | IV | 0 |
| 56 | Male   | 1933/7/1   | 79.9 | >70  | 0-1 | IV | 0 |
| 57 | Female | 1947/7/1   | 64.1 | <=70 | 0-1 | IV | 2 |
| 58 | Female | 1927/7/1   | 81.6 | >70  | 0-1 | IV | 0 |
| 59 | Female | 1936/12/11 | 71   | >70  | 0-1 | IV | 6 |
| 60 | Male   | 1925/7/1   | 84.8 | >70  | 0-1 | IV | 0 |
| 61 | Male   | 1940/1/1   | 66.3 | <=70 | 0-1 | IV | 1 |
| 62 | Male   | 1936/1/1   | 73.9 | >70  | 0-1 | IV | 0 |
| 63 | Female | 1950/7/1   | 57.1 | <=70 | 0-1 | IV | 0 |
| 64 | Female | 1949/7/1   | 61.9 | <=70 | 0-1 | IV | 0 |
| 65 | Male   | 1945/7/1   | 64.9 | <=70 | 0-1 | IV | 0 |
| 66 | Male   | 1943/1/1   | 64.5 | <=70 | 0-1 | IV | 1 |
| 67 | Male   | 1974/7/1   | 37.3 | <=70 | 0-1 | IV | 0 |
| 68 | Female | 1967/7/1   | 43.7 | <=70 | 0-1 | IV | 0 |
| 69 | Male   | 1946/7/1   | 63.8 | <=70 | 0-1 | IV | 0 |
| 70 | Female | 1938/7/1   | 72.2 | >70  | 0-1 | IV | 0 |
| 71 | Female | 1962/11/10 | 47.7 | <=70 | 0-1 | IV | 0 |
| 72 | Male   | 1952/7/1   | 59   | <=70 | 0-1 | IV | 0 |
| 73 | Male   | 1934/7/1   | 74   | >70  | 0-1 | IV | 0 |
| 74 | Female | 1936/7/1   | 71.9 | >70  | 0-1 | IV | 9 |
| 75 | Male   | 1937/7/1   | 75.6 | >70  | 0-1 | IV | 5 |
| 76 | Male   | 1943/7/1   | 64.5 | <=70 | 0-1 | IV | 0 |
| 77 | Female | 1929/7/1   | 81.6 | >70  | 0-1 | IV | 0 |
| 78 | Female | 1925/7/1   | 82.3 | >70  | >=2 | IV | 1 |
| 79 | Male   | 1944/7/1   | 65.1 | <=70 | 0-1 | IV | 0 |
| 80 | Male   | 1955/7/1   | 57.6 | <=70 | >=2 | IV | 1 |
| 81 | Male   | 1967/12/9  | 44.9 | <=70 | 0-1 | IV | 0 |
| 82 | Male   | 1934/1/1   | 74.2 | >70  | 0-1 | IV | 0 |
| 83 | Male   | 1950/7/1   | 57.9 | <=70 | 0-1 | IV | 0 |
| 84 | Female | 1953/7/1   | 56.2 | <=70 | 0-1 | IV | 1 |
| 85 | Male   | 1960/7/1   | 49.2 | <=70 | 0-1 | IV | 0 |
| 86 | Male   | 1943/7/1   | 66.3 | <=70 | 0-1 | IV | 0 |
| 87 | Male   | 1953/7/1   | 59.3 | <=70 | 0-1 | IV | 0 |
| 88 | Male   | 1941/7/1   | 69.7 | <=70 | 0-1 | IV | 0 |
| 89 | Male   | 1977/7/1   | 34.2 | <=70 | 0-1 | IV | 0 |
| 90 | Male   | 1970/7/1   | 42.7 | <=70 | 0-1 | IV | 9 |
| 91 | Male   | 1940/7/1   | 69   | <=70 | 0-1 | IV | 0 |
| 92 | Male   | 1954/7/1   | 59.1 | <=70 | 0-1 | IV | 1 |
| 93 | Male   | 1936/7/1   | 74   | >70  | 0-1 | IV | 0 |
| 94 | Female | 1949/7/1   | 62.1 | <=70 | >=2 | IV | 0 |
| 95 | Male   | 1955/7/1   | 53.6 | <=70 | 0-1 | IV | 0 |
| 96 | Male   | 1937/7/1   | 73.2 | >70  | 0-1 | IV | 0 |
| 97 | Male   | 1949/7/1   | 64.4 | <=70 | 0-1 | IV | 1 |
| 98 | Male   | 1952/7/1   | 57.4 | <=70 | 0-1 | IV | 0 |
| 99 | Female | 1968/7/1   | 40.5 | <=70 | >=2 | IV | 0 |

|     |        |            |      |      |     |    |    |
|-----|--------|------------|------|------|-----|----|----|
| 100 | Female | 1944/7/1   | 64.5 | <=70 | 0-1 | IV | 0  |
| 101 | Male   | 1938/7/1   | 73.6 | >70  | 0-1 | IV | 5  |
| 102 | Female | 1965/7/1   | 42.1 | <=70 | 0-1 | IV | 0  |
| 103 | Female | 1964/1/1   | 46.8 | <=70 | 0-1 | IV | 0  |
| 104 | Male   | 1944/7/1   | 66.3 | <=70 | 0-1 | IV | 0  |
| 105 | Female | 1944/6/19  | 64.3 | <=70 | 0-1 | IV | 2  |
| 106 | Male   | 1949/7/1   | 59.3 | <=70 | 0-1 | IV | 0  |
| 107 | Female | 1937/7/1   | 75.2 | >70  | 0-1 | IV | 0  |
| 108 | Male   | 1927/1/1   | 82   | >70  | 0-1 | IV | 2  |
| 109 | Male   | 1933/7/1   | 76.9 | >70  | 0-1 | IV | 0  |
| 110 | Female | 1951/1/1   | 58   | <=70 | 0-1 | IV | 0  |
| 111 | Male   | 1949/7/1   | 60.3 | <=70 | 0-1 | IV | 1  |
| 112 | Female | 1939/7/1   | 71.1 | >70  | 0-1 | IV | 0  |
| 113 | Male   | 1937/7/1   | 73.2 | >70  | 0-1 | IV | 0  |
| 114 | Male   | 1959/7/1   | 50.1 | <=70 | 0-1 | IV | 0  |
| 115 | Male   | 1974/7/1   | 37.3 | <=70 | 0-1 | IV | 0  |
| 116 | Male   | 1925/7/1   | 85.9 | >70  | 0-1 | IV | 0  |
| 117 | Male   | 1925/7/1   | 82.7 | >70  | 0-1 | IV | 0  |
| 118 | Female | 1934/7/1   | 75.3 | >70  | 0-1 | IV | 8  |
| 119 | Male   | 1942/7/1   | 69.7 | <=70 | >=2 | IV | 0  |
| 120 | Male   | 1942/7/1   | 69   | <=70 | 0-1 | IV | 2  |
| 121 | Female | 1938/7/1   | 72.1 | >70  | 0-1 | IV | 0  |
| 122 | Male   | 1932/7/1   | 75.1 | >70  | 0-1 | IV | 1  |
| 123 | Male   | 1955/7/1   | 55.5 | <=70 | 0-1 | IV | 0  |
| 124 | Female | 1945/7/1   | 63.7 | <=70 | 0-1 | IV | 1  |
| 125 | Male   | 1934/7/1   | 78.1 | >70  | >=2 | IV | 0  |
| 126 | Male   | 1932/7/1   | 78.6 | >70  | 0-1 | IV | 0  |
| 127 | Male   | 1950/7/1   | 61.3 | <=70 | 0-1 | IV | 0  |
| 128 | Female | 1953/7/1   | 55.8 | <=70 | 0-1 | IV | 0  |
| 129 | Male   | 1955/7/1   | 53.7 | <=70 | 0-1 | IV | 0  |
| 130 | Female | 1938/7/1   | 69.6 | <=70 | 0-1 | IV | 0  |
| 131 | Female | 1944/7/1   | 64.9 | <=70 | 0-1 | IV | 0  |
| 132 | Female | 1956/4/8   | 51.9 | <=70 | 0-1 | IV | 0  |
| 133 | Female | 1940/7/1   | 71.5 | >70  | 0-1 | IV | 0  |
| 134 | Male   | 1936/7/1   | 74.4 | >70  | 0-1 | IV | 1  |
| 135 | Female | 1950/7/1   | 50.2 | <=70 | 0-1 | IV | 0  |
| 136 | Male   | 1952/10/26 | 59.6 | <=70 | 0-1 | IV | 0  |
| 137 | Male   | 1945/7/1   | 65.2 | <=70 | 0-1 | IV | 13 |
| 138 | Male   | 1944/7/1   | 68.3 | <=70 | 0-1 | IV | 0  |
| 139 | Female | 1930/7/1   | 81.9 | >70  | 0-1 | IV | 1  |
| 140 | Male   | 1939/7/1   | 72.6 | >70  | 0-1 | IV | 7  |
| 141 | Male   | 1938/7/1   | 74.3 | >70  | 0-1 | IV | 11 |
| 142 | Male   | 1967/7/1   | 44.2 | <=70 | 0-1 | IV | 19 |
| 143 | Male   | 1944/7/1   | 68.7 | <=70 | 0-1 | IV | 0  |
| 144 | Male   | 1945/7/1   | 68.1 | <=70 | 0-1 | IV | 0  |
| 145 | Male   | 1937/7/1   | 73   | >70  | >=2 | IV | 0  |
| 146 | Male   | 1942/7/1   | 69.4 | <=70 | 0-1 | IV | 0  |
| 147 | Male   | 1966/7/1   | 43.8 | <=70 | 0-1 | IV | 0  |
| 148 | Male   | 1953/7/1   | 56.4 | <=70 | 0-1 | IV | 15 |
| 149 | Male   | 1939/7/1   | 72.8 | >70  | 0-1 | IV | 16 |

|     |        |            |      |      |     |    |    |
|-----|--------|------------|------|------|-----|----|----|
| 150 | Male   | 1940/7/1   | 72.5 | >70  | 0-1 | IV | 0  |
| 151 | Male   | 1946/7/1   | 65.2 | <=70 | 0-1 | IV | 0  |
| 152 | Female | 1923/7/1   | 85.7 | >70  | 0-1 | IV | 0  |
| 153 | Male   | 1956/7/1   | 53.7 | <=70 | 0-1 | IV | 0  |
| 154 | Male   | 1945/7/1   | 64.7 | <=70 | >=2 | IV | 0  |
| 155 | Female | 1934/10/18 | 77.1 | >70  | 0-1 | IV | 0  |
| 156 | Male   | 1951/7/1   | 61.9 | <=70 | 0-1 | IV | 4  |
| 157 | Female | 1960/7/1   | 51.1 | <=70 | 0-1 | IV | 0  |
| 158 | Female | 1967/7/1   | 40.5 | <=70 | 0-1 | IV | 2  |
| 159 | Male   | 1943/7/1   | 64   | <=70 | 0-1 | IV | 0  |
| 160 | Male   | 1954/9/17  | 54.8 | <=70 | 0-1 | IV | 0  |
| 161 | Male   | 1938/7/1   | 74.4 | >70  | 0-1 | IV | 2  |
| 162 | Female | 1970/7/1   | 38.7 | <=70 | >=2 | IV | 0  |
| 163 | Female | 1953/7/1   | 58.3 | <=70 | 0-1 | IV | 0  |
| 164 | Male   | 1934/1/1   | 76.1 | >70  | 0-1 | IV | 0  |
| 165 | Female | 1958/7/1   | 53.3 | <=70 | 0-1 | IV | 14 |
| 166 | Female | 1935/7/1   | 74   | >70  | 0-1 | IV | 0  |
| 167 | Male   | 1944/1/1   | 63.8 | <=70 | 0-1 | IV | 0  |
| 168 | Male   | 1937/7/1   | 70.4 | >70  | 0-1 | IV | 4  |
| 169 | Male   | 1928/7/1   | 84   | >70  | 0-1 | IV | 0  |
| 170 | Male   | 1930/7/1   | 80.4 | >70  | 0-1 | IV | 0  |
| 171 | Female | 1938/7/1   | 72   | >70  | 0-1 | IV | 1  |
| 172 | Male   | 1967/7/1   | 42.8 | <=70 | 0-1 | IV | 1  |
| 173 | Female | 1935/1/1   | 78.5 | >70  | >=2 | IV | 1  |
| 174 | Male   | 1952/7/1   | 58.6 | <=70 | 0-1 | IV | 0  |
| 175 | Female | 1949/1/1   | 59.9 | <=70 | 0-1 | IV | 0  |
| 176 | Female | 1958/7/1   | 55.2 | <=70 | 0-1 | IV | 0  |
| 177 | Female | 1959/7/1   | 50.4 | <=70 | 0-1 | IV | 0  |
| 178 | Male   | 1930/7/27  | 78.6 | >70  | 0-1 | IV | 0  |
| 179 | Male   | 1953/7/1   | 58.6 | <=70 | 0-1 | IV | 0  |
| 180 | Female | 1942/7/1   | 66.4 | <=70 | 0-1 | IV | 3  |
| 181 | Male   | 1941/7/1   | 71.1 | >70  | 0-1 | IV | 0  |
| 182 | Male   | 1948/7/1   | 62.2 | <=70 | 0-1 | IV | 0  |
| 183 | Female | 1933/7/1   | 79.9 | >70  | 0-1 | IV | 0  |
| 184 | Female | 1941/7/1   | 67   | <=70 | 0-1 | IV | 3  |
| 185 | Female | 1963/7/1   | 47.6 | <=70 | 0-1 | IV | 1  |
| 186 | Female | 1951/7/1   | 62.5 | <=70 | 0-1 | IV | 0  |
| 187 | Male   | 1941/6/2   | 69.1 | <=70 | 0-1 | IV | 0  |
| 188 | Female | 1941/7/1   | 69   | <=70 | 0-1 | IV | 2  |
| 189 | Male   | 1930/7/1   | 79.9 | >70  | >=2 | IV | 0  |
| 190 | Male   | 1949/1/28  | 57.8 | <=70 | 0-1 | IV | 1  |
| 191 | Female | 1931/7/1   | 81.7 | >70  | 0-1 | IV | 0  |
| 192 | Male   | 1935/7/1   | 74.3 | >70  | 0-1 | IV | 2  |
| 193 | Male   | 1942/7/1   | 69   | <=70 | 0-1 | IV | 0  |
| 194 | Male   | 1949/7/1   | 62.6 | <=70 | >=2 | IV | 1  |
| 195 | Male   | 1945/7/1   | 66.5 | <=70 | >=2 | IV | 7  |
| 196 | Male   | 1932/7/1   | 75.2 | >70  | >=2 | IV | 0  |
| 197 | Male   | 1943/7/1   | 67   | <=70 | 0-1 | IV | 1  |
| 198 | Male   | 1931/1/1   | 79.2 | >70  | 0-1 | IV | 2  |

| CEA+/EpCAM- | CEA-/EpCAM+ | KRAS   | BRAF   | MSI Status | Grade |
|-------------|-------------|--------|--------|------------|-------|
| 1           | 0           | Mutant | WT     |            | III   |
| 0           | 0           | Mutant | WT     | MSS        | II    |
| 0           | 0           | WT     | WT     |            | III   |
| 0           | 0           | WT     | Mutant |            |       |
| 2           | 1           |        |        |            | II    |
| 8           | 1           | Mutant | WT     |            | III   |
| 14          | 4           | Mutant | WT     |            | II    |
| 0           | 0           | Mutant | WT     |            | II    |
| 1           | 0           | Mutant | WT     |            | III   |
| 1           | 6           | Mutant | WT     | MSS        | II    |
| 4           | 0           | WT     | Mutant | MSS        | III   |
| 0           | 0           | WT     | WT     |            | II    |
| 1           | 1           | Mutant | WT     |            | II    |
| 6           | 0           | WT     | Mutant |            | II    |
| 2           | 0           | WT     | WT     |            | III   |
| 0           | 0           | Mutant | WT     | MSS        | II    |
| 1           | 0           | WT     | WT     | MSS        | II    |
| 5           | 1           | WT     | WT     |            | II    |
| 0           | 0           | Mutant | WT     | MSS        | II    |
| 3           | 0           | WT     | WT     |            | II    |
| 4           | 0           | Mutant | WT     |            | II    |
| 1           | 0           | WT     | Mutant |            | III   |
| 2           | 0           | WT     | WT     |            | II    |
| 0           | 0           | Mutant | WT     |            | II    |
| 4           | 0           | WT     | Mutant | MSS        | III   |
| 1           | 0           | Mutant | WT     | MSS        | II    |
| 0           | 0           | WT     | WT     | MSS        | II    |
| 12          | 0           | Mutant | WT     | MSS        | III   |
| 0           | 0           | Mutant | WT     |            | III   |
| 2           | 0           | Mutant | WT     |            | II    |
| 3           | 0           | WT     | WT     |            | III   |
| 0           | 0           | Mutant | WT     |            | III   |
| 1           | 0           | WT     | WT     | MSS        | III   |
| 0           | 0           | WT     | WT     | MSS        | III   |
| 1           | 0           | WT     | WT     |            | II    |
| 0           | 0           | WT     | WT     | MSS        | III   |
| 2           | 0           | Mutant | WT     | MSS        | III   |
| 1           | 0           | Mutant | WT     | MSI-High   | III   |
| 2           | 0           | WT     | WT     | MSS        | III   |
| 4           | 0           | Mutant | WT     | MSS        | II    |
| 0           | 0           | WT     | WT     | MSS        | II    |
| 1           | 0           | Mutant | WT     | MSS        | II    |
| 2           | 0           | WT     | WT     | MSS        | II    |
| 0           | 0           | WT     | WT     | MSS        |       |
| 6           | 0           | Mutant | WT     |            | II    |
| 1           | 0           | Mutant | WT     | MSS        | II    |
| 1           | 0           | WT     | WT     |            | II    |
| 0           | 0           | WT     | WT     |            | II    |
| 4           | 1           | WT     | WT     | MSS        | II    |

|    |   |        |        |     |     |
|----|---|--------|--------|-----|-----|
| 0  | 0 | Mutant | WT     |     | III |
| 3  | 0 | Mutant | WT     |     | II  |
| 0  | 0 | WT     | WT     |     | III |
| 0  | 0 | WT     | WT     |     | II  |
| 2  | 0 | WT     | WT     | MSS | III |
| 0  | 0 | Mutant | WT     | MSS | II  |
| 0  | 0 | WT     | WT     | MSS | III |
| 2  | 0 | WT     | WT     |     | II  |
| 0  | 0 | WT     | WT     |     | II  |
| 3  | 0 | WT     | WT     | MSS | II  |
| 8  | 0 | Mutant | WT     |     | II  |
| 4  | 0 | WT     | WT     | MSS | II  |
| 3  | 0 | Mutant | WT     | MSS | II  |
| 0  | 0 |        | WT     |     | II  |
| 0  | 0 | Mutant | WT     |     | III |
| 0  | 0 | WT     | WT     | MSS | II  |
| 4  | 1 | WT     | WT     |     | II  |
| 1  | 0 | WT     | WT     |     | III |
| 1  | 0 | Mutant | WT     |     | II  |
| 1  | 0 | Mutant | WT     | MSS | II  |
| 0  | 0 | WT     | WT     | MSS | II  |
| 0  | 0 | Mutant | WT     | MSS | III |
| 0  | 0 | Mutant | Mutant | MSS | III |
| 0  | 0 | WT     | WT     | MSS | II  |
| 4  | 0 | WT     | WT     |     | III |
| 0  | 0 | WT     | WT     | MSS | III |
| 2  | 0 | WT     | WT     |     | II  |
| 0  | 0 | WT     | WT     |     | II  |
| 3  | 0 |        | WT     |     | III |
| 0  | 0 | Mutant | Mutant | MSS | III |
| 3  | 0 | WT     | WT     |     | II  |
| 4  | 0 | Mutant | WT     |     | III |
| 0  | 0 | WT     | Mutant |     | II  |
| 0  | 0 | WT     | WT     |     | III |
| 1  | 0 | Mutant | WT     |     | III |
| 0  | 0 | Mutant | WT     |     | II  |
| 0  | 0 | Mutant | Mutant |     | III |
| 0  | 0 | WT     |        | MSS | III |
| 2  | 0 | WT     | WT     | MSS | II  |
| 0  | 0 | Mutant | WT     |     |     |
| 22 | 4 | WT     |        |     | II  |
| 0  | 0 | Mutant | WT     |     | II  |
| 1  | 0 | WT     |        |     | III |
| 1  | 0 | Mutant | WT     |     | II  |
| 4  | 0 | WT     | Mutant |     | II  |
| 2  | 0 | Mutant | WT     |     | III |
| 0  | 0 | Mutant | WT     | MSS | III |
| 2  | 0 | WT     | WT     | MSS | III |
| 0  | 0 | WT     |        |     | III |
| 0  | 0 | WT     | WT     | MSS | III |

|    |   |        |        |     |     |
|----|---|--------|--------|-----|-----|
| 0  | 0 | WT     | WT     | MSS | II  |
| 3  | 0 | Mutant | WT     |     | II  |
| 0  | 0 | WT     | WT     |     | III |
| 2  | 0 | WT     | WT     |     | III |
| 2  | 0 | Mutant | WT     | MSS | II  |
| 0  | 0 | WT     | WT     |     | II  |
| 1  | 0 | WT     | WT     | MSS | III |
| 1  | 0 | Mutant | WT     | MSS | II  |
| 0  | 1 | WT     | WT     |     | II  |
| 1  | 0 | WT     | WT     |     | III |
| 0  | 0 | Mutant | WT     | MSS | I   |
| 3  | 0 | Mutant | WT     |     | II  |
| 0  | 0 | WT     | WT     | MSS | II  |
| 0  | 0 | WT     | WT     | MSS | II  |
| 2  | 0 | WT     | WT     | MSS | II  |
| 0  | 0 | Mutant | WT     | MSS | II  |
| 0  | 0 | Mutant | WT     |     | II  |
| 0  | 0 | Mutant | WT     | MSS | II  |
| 4  | 0 | Mutant | WT     | MSS | II  |
| 0  | 0 | WT     | Mutant |     | II  |
| 4  | 1 | Mutant | WT     | MSS |     |
| 0  | 0 | WT     | WT     | MSS | II  |
| 2  | 1 | WT     | WT     |     | III |
| 0  | 0 | Mutant | WT     | MSS | III |
| 0  | 1 | WT     | WT     | MSS | III |
| 2  | 0 | WT     | WT     | MSS | III |
| 2  | 0 | Mutant | WT     |     | II  |
| 2  | 0 | Mutant | WT     |     | III |
| 0  | 0 | Mutant | WT     |     | II  |
| 1  | 0 | WT     | WT     |     | III |
| 1  | 0 | WT     | WT     | MSS | III |
| 0  | 0 | Mutant | WT     | MSS | II  |
| 3  | 0 | Mutant | WT     | MSS | II  |
| 0  | 0 | WT     | WT     |     | II  |
| 2  | 0 | WT     | WT     |     | III |
| 2  | 0 | Mutant | WT     |     | II  |
| 0  | 0 | WT     | Mutant | MSS | III |
| 7  | 0 | WT     | WT     |     | III |
| 8  | 0 | Mutant | WT     | MSS | II  |
| 1  | 0 | WT     | Mutant | MSS | II  |
| 6  | 0 | WT     |        |     | II  |
| 9  | 0 | Mutant | WT     |     | III |
| 12 | 0 | WT     | WT     | MSS | III |
| 0  | 0 | WT     | WT     |     | II  |
| 1  | 3 | WT     | WT     | MSS | III |
| 0  | 0 | Mutant | WT     |     | II  |
| 0  | 0 | WT     | WT     | MSS | II  |
| 0  | 0 | Mutant | WT     |     | III |
| 4  | 3 | Mutant | WT     | MSS | II  |
| 11 | 0 | Mutant | WT     | MSS |     |

|    |   |        |        |          |     |
|----|---|--------|--------|----------|-----|
| 0  | 0 | WT     | WT     | MSS      | II  |
| 0  | 0 | Mutant | WT     | MSI-High | III |
| 0  | 0 |        | WT     |          | II  |
| 0  | 0 | WT     | WT     | MSS      | III |
| 0  | 0 | WT     | WT     | MSS      | I   |
| 1  | 0 | WT     | WT     |          | III |
| 1  | 0 | Mutant | WT     |          | III |
| 0  | 0 | WT     | WT     | MSS      | II  |
| 1  | 0 | WT     | WT     |          | II  |
| 0  | 0 | Mutant | WT     | MSS      | III |
| 0  | 0 | WT     | WT     | MSS      | III |
| 5  | 0 | Mutant | WT     | MSS      | III |
| 0  | 0 | WT     | WT     |          | II  |
| 0  | 0 | WT     | WT     | MSI-High | II  |
| 0  | 0 | WT     | WT     | MSS      | II  |
| 5  | 0 | WT     | WT     | MSS      | III |
| 0  | 0 |        | WT     |          | II  |
| 0  | 0 | WT     | WT     | MSS      | II  |
| 2  | 0 |        | WT     |          | III |
| 0  | 0 | WT     | WT     | MSS      | II  |
| 0  | 0 | Mutant | WT     | MSS      | II  |
| 3  | 0 | WT     | WT     | MSS      | III |
| 2  | 0 | Mutant | WT     |          | I   |
| 1  | 0 | WT     | WT     | MSS      | II  |
| 0  | 0 | Mutant | WT     | MSS      | II  |
| 0  | 0 | Mutant | WT     |          | II  |
| 2  | 0 | Mutant | WT     | MSS      | III |
| 4  | 0 | WT     | Mutant |          | III |
| 0  | 0 | WT     | WT     |          | II  |
| 1  | 0 | Mutant | WT     |          | II  |
| 7  | 2 | WT     | WT     |          | III |
| 3  | 0 | Mutant | WT     | MSS      | II  |
| 2  | 0 | Mutant | WT     | MSS      | II  |
| 0  | 0 | WT     | WT     |          | I   |
| 5  | 0 | Mutant | WT     |          | II  |
| 9  | 0 | WT     | Mutant | MSS      | III |
| 3  | 0 | Mutant | WT     | MSS      | III |
| 0  | 0 | Mutant | WT     | MSS      | II  |
| 6  | 0 | WT     | WT     |          | II  |
| 2  | 0 | WT     | WT     | MSI-High | II  |
| 0  | 0 |        | WT     |          | III |
| 1  | 0 |        | WT     |          | II  |
| 4  | 0 | Mutant | WT     |          |     |
| 0  | 0 | Mutant | WT     |          | II  |
| 2  | 0 | Mutant | WT     | MSS      | III |
| 11 | 2 | WT     | WT     | MSS      | II  |
| 0  | 0 |        | WT     |          | II  |
| 3  | 0 | WT     | WT     | MSS      | II  |
| 3  | 0 | Mutant | WT     | MSS      | II  |



| <b>Metastasectomy</b> | <b>Primary</b>        | <b>Surgery</b> | <b>Baseline Date</b> |
|-----------------------|-----------------------|----------------|----------------------|
| no                    | TRANSVERSE/DESCENDING | No             | 2010/12/22           |
| yes                   | ASCENDING             | Yes            | 2010/4/16            |
| no                    | COLON                 | Yes            | 2013/3/26            |
| no                    | RECTUM                | No             | 2011/5/26            |
| no                    | RECTUM                | No             | 2012/7/19            |
| no                    | RECTUM                | No             | 2013/2/18            |
| no                    | SIGMOID               | Yes            | 2012/9/10            |
| no                    | RECTUM                | No             | 2008/9/9             |
| no                    | RECTUM                | No             | 2007/12/20           |
| no                    | RECTUM                | Yes            | 2009/12/21           |
| no                    | COLON                 | Yes            | 2013/12/12           |
| no                    | RECTUM                | Yes            | 2013/8/5             |
| no                    | RECTUM                | Yes            | 2007/12/21           |
| no                    | RECTUM                | No             | 2008/8/5             |
| yes                   | RECTUM                | Yes            | 2009/6/23            |
| no                    | RECTUM                | Yes            | 2009/2/20            |
| no                    | SIGMOID               | Yes            | 2012/9/26            |
| no                    | SIGMOID               | No             | 2012/7/9             |
| no                    | RECTUM                | Yes            | 2010/12/27           |
| no                    | RECTUM                | Yes            | 2011/9/21            |
| no                    | CECUM                 | No             | 2012/2/14            |
| no                    | COLON                 | Yes            | 2007/10/22           |
| no                    | RECTUM-SIGMOID        | Yes            | 2007/11/26           |
| no                    | RECTUM                | Yes            | 2009/2/11            |
| no                    | RECTUM                | Yes            | 2010/1/11            |
| yes                   | COLON                 | Yes            | 2009/2/11            |
| no                    | RECTUM                | No             | 2012/6/19            |
| no                    | RECTUM                | Yes            | 2011/3/30            |
| no                    | SIGMOID               | No             | 2011/3/22            |
| yes                   | RECTUM                | No             | 2012/12/27           |
| no                    | COLON                 | Yes            | 2013/7/15            |
| no                    | RECTUM                | No             | 2008/2/20            |
| no                    | COLON                 | No             | 2010/7/28            |
| no                    | SIGMOID               | Yes            | 2012/8/1             |
| no                    | COLON                 | Yes            | 2009/10/26           |
| no                    | ASCENDING             | Yes            | 2009/6/25            |
| no                    | SIGMOID               | Yes            | 2009/6/11            |
| no                    | Transverse            | Yes            | 2008/5/28            |
| no                    | Colon                 | Yes            | 2002/8/26            |
| yes                   | SIGMOID               | Yes            | 2008/3/12            |
| yes                   | RECTUM                | No             | 2009/10/20           |
| no                    | SIGMOID               | Yes            | 2010/7/12            |
| no                    | RECTUM                | Yes            | 2011/11/7            |
| yes                   | SIGMOID               | No             | 2010/9/24            |
| no                    | CECUM                 | Yes            | 2011/8/12            |
| no                    | SIGMOID/RECTUM        | Yes            | 2012/3/9             |
| no                    | SIGMOID               | No             | 2012/11/14           |
| yes                   | RECTUM                | Yes            | 2010/3/9             |
| no                    | SIGMOID               | Yes            | 2008/1/30            |

|     |                      |     |            |
|-----|----------------------|-----|------------|
| no  | SIGMOID              | Yes | 2012/6/25  |
| no  | SIGMOID              | Yes | 2012/10/9  |
| yes | SIGMOID              | Yes | 2010/6/16  |
| no  | RECTUM/SIGMOID       | No  | 2011/8/11  |
| no  | Descending           | Yes | 2011/11/14 |
| no  | COLON                | Yes | 2013/3/8   |
| no  | SIGMOID              | Yes | 2013/6/12  |
| no  | RECTUM               | No  | 2011/8/11  |
| no  | RECTUM               | Yes | 2009/1/27  |
| no  | RECTUM               | No  | 2007/12/20 |
| no  | RECTUM               | Yes | 2010/4/26  |
| yes | RECTO-SIGMOID        | Yes | 2006/4/27  |
| no  | RECTUM               | Yes | 2009/11/10 |
| no  | SIGMOID              | No  | 2007/8/14  |
| no  | ASCENDING            | No  | 2011/6/2   |
| no  | SIGMOID              | Yes | 2010/5/25  |
| yes | ASCENDING/TRANSVERSE | Yes | 2007/6/18  |
| no  | Descending           | Yes | 2011/10/24 |
| no  | RECTUM/SIGMOID       | Yes | 2011/2/24  |
| yes | RECTUM               | Yes | 2010/5/4   |
| yes | RECTUM/SIGMOID       | Yes | 2010/9/16  |
| no  | COLON                | Yes | 2010/8/2   |
| no  | DESCENDING/SIGMOID   | Yes | 2011/6/20  |
| no  | RECTUM               | Yes | 2008/6/26  |
| no  | ASCENDING            | Yes | 2008/6/6   |
| no  | RECTUM               | Yes | 2013/2/22  |
| no  | SIGMOID              | No  | 2007/12/27 |
| no  | RECTUM               | Yes | 2011/2/2   |
| no  | RECTUM               | No  | 2007/10/30 |
| no  | SIGMOID              | Yes | 2009/8/19  |
| no  | RECTUM               | Yes | 2013/1/30  |
| yes | SIGMOID              | Yes | 2012/11/5  |
| no  | CECUM                | Yes | 2008/3/7   |
| no  | SIGMOID              | Yes | 2008/5/30  |
| no  | RECTUM               | Yes | 2009/9/29  |
| no  | CECUM                | No  | 2009/9/2   |
| no  | SIGMOID              | Yes | 2009/10/2  |
| no  | RECTUM               | Yes | 2012/10/23 |
| no  | RECTUM               | Yes | 2011/2/28  |
| no  | Descending           | Yes | 2011/9/18  |
| no  | RECTUM               | Yes | 2013/3/22  |
| no  | RECTUM               | No  | 2009/7/7   |
| no  | RECTUM               | Yes | 2013/8/5   |
| yes | SIGMOID              | No  | 2010/7/5   |
| no  | COLON                | No  | 2011/8/5   |
| no  | CECUM                | Yes | 2009/2/5   |
| no  | SIGMOID/RECTUM       | Yes | 2010/8/30  |
| no  | RECTUM               | Yes | 2013/11/25 |
| yes | COLON                | Yes | 2009/11/25 |
| no  | ASCENDING            | Yes | 2008/12/19 |

|     |                       |     |            |
|-----|-----------------------|-----|------------|
| yes | RECTUM                | Yes | 2008/12/19 |
| no  | SIGMOID               | Yes | 2012/2/9   |
| no  | RECTUM                | Yes | 2007/7/20  |
| yes | SIGMOID               | Yes | 2010/10/25 |
| no  | ASCENDING             | Yes | 2010/10/4  |
| yes | DESCENDING/TRANSVERSE | Yes | 2008/9/29  |
| no  | COLON                 | Yes | 2008/10/10 |
| no  | COLON                 | Yes | 2012/9/24  |
| no  | RECTUM                | No  | 2008/12/29 |
| no  | RECTUM                | Yes | 2010/5/10  |
| yes | SIGMOID               | Yes | 2008/12/19 |
| no  | SIGMOID               | Yes | 2009/10/26 |
| no  | SIGMOID               | Yes | 2010/8/16  |
| no  | Transverse            | Yes | 2010/9/27  |
| no  | RECTUM                | Yes | 2009/8/10  |
| yes | RECTUM                | Yes | 2011/10/12 |
| no  | RECTUM                | No  | 2011/5/9   |
| no  | RECTUM                | No  | 2008/3/7   |
| no  | CECUM                 | Yes | 2009/10/16 |
| no  | RECTUM                | Yes | 2012/3/20  |
| no  | RECTUM                | No  | 2011/7/6   |
| yes | RECTUM                | Yes | 2010/8/10  |
| no  | SIGMOID               | Yes | 2007/8/14  |
| no  | ASCENDING             | Yes | 2010/12/15 |
| no  | COLON                 | Yes | 2009/3/23  |
| no  | SIGMOID               | Yes | 2012/8/8   |
| no  | RECTUM/SIGMOID        | Yes | 2011/2/20  |
| no  | RECTUM                | No  | 2011/10/19 |
| yes | SIGMOID               | Yes | 2009/4/6   |
| yes | RECTUM                | Yes | 2009/3/17  |
| no  | SIGMOID               | Yes | 2008/1/23  |
| no  | RECTUM/SIGMOID        | Yes | 2009/5/14  |
| no  | SIGMOID               | No  | 2008/3/4   |
| no  | SIGMOID               | Yes | 2012/1/9   |
| no  | ASCENDING             | No  | 2010/11/26 |
| no  | RECTUM                | No  | 2000/9/18  |
| no  | SIGMOID               | Yes | 2012/5/23  |
| no  | ASCENDING             | Yes | 2010/8/30  |
| yes | SIGMOID               | Yes | 2012/10/8  |
| no  | RECTUM                | No  | 2012/6/5   |
| no  | SIGMOID/RECTUM        | Yes | 2012/1/31  |
| no  | RECTUM                | Yes | 2012/10/24 |
| no  | ASCENDING             | Yes | 2011/8/26  |
| yes | SIGMOID/RECTUM        | Yes | 2013/2/26  |
| no  | SIGMOID               | Yes | 2013/7/22  |
| no  | SIGMOID               | No  | 2010/6/13  |
| yes | SIGMOID               | Yes | 2011/12/5  |
| no  | RECTUM                | Yes | 2010/4/28  |
| no  | Descending            | No  | 2009/11/30 |
| no  | COLON                 | No  | 2012/5/2   |

|     |                              |     |            |
|-----|------------------------------|-----|------------|
| yes | Sigmoid                      | Yes | 2012/12/18 |
| no  | CECUM                        | Yes | 2011/9/2   |
| no  | COLON                        | Yes | 2009/3/23  |
| no  | Descending                   | Yes | 2010/3/23  |
| no  | SIGMOID                      | Yes | 2010/3/30  |
| no  | CECUM                        | Yes | 2011/11/10 |
| yes | COLON                        | No  | 2013/5/20  |
| yes | SIGMOID                      | Yes | 2011/8/12  |
| no  | SIGMOID                      | Yes | 2008/1/7   |
| no  | RECTUM                       | Yes | 2007/7/11  |
| no  | SIGMOID                      | Yes | 2009/7/13  |
| no  | Descending                   | Yes | 2012/11/26 |
| no  | ASCENDING                    | Yes | 2009/3/16  |
| no  | SIGMOID                      | No  | 2011/10/6  |
| yes | COLON                        | Yes | 2010/2/22  |
| no  | RECTUM                       | No  | 2011/10/20 |
| no  | SIGMOID                      | No  | 2009/7/10  |
| yes | SIGMOID                      | Yes | 2007/10/30 |
| no  | RECTO-SIGMOID                | Yes | 2007/11/26 |
| no  | SIGMOID                      | Yes | 2012/7/3   |
| no  | SIGMOID                      | Yes | 2010/11/18 |
| yes | RECTUM/SIGMOID               | Yes | 2010/6/21  |
| no  | APPENDIX (BLENNΩΔΕΣ ΑΔΕΝΟΧΑ) | Yes | 2010/4/13  |
| no  | RECTUM                       | No  | 2013/7/1   |
| yes | RECTUM                       | Yes | 2011/1/27  |
| no  | SIGMOID                      | Yes | 2008/12/5  |
| yes | ASCENDING                    | Yes | 2013/9/25  |
| no  | COLON                        | Yes | 2009/12/7  |
| no  | SIGMOID                      | Yes | 2009/2/27  |
| no  | SIGMOID                      | Yes | 2012/2/2   |
| no  | Transverse                   | Yes | 2008/11/6  |
| no  | RECTUM                       | No  | 2012/7/23  |
| yes | RECTUM                       | Yes | 2010/9/22  |
| no  | RECTUM                       | No  | 2013/6/12  |
| no  | RECTUM                       | No  | 2008/6/19  |
| no  | RECTUM                       | Yes | 2011/2/1   |
| yes | RECTUM                       | Yes | 2013/12/27 |
| no  | CECUM                        | Yes | 2010/7/9   |
| no  | SIGMOID                      | Yes | 2010/6/23  |
| no  | RECTUM                       | Yes | 2010/5/25  |
| no  | ASCENDING                    | No  | 2006/11/29 |
| no  | RECTUM                       | Yes | 2013/3/26  |
| yes | UNKNOWN                      | No  | 2009/11/2  |
| no  | TRANSVERSE                   | Yes | 2011/7/18  |
| no  | SIGMOID                      | Yes | 2012/2/7   |
| yes | SIGMOID                      | Yes | 2012/1/18  |
| no  | SIGMOID                      | Yes | 2007/9/19  |
| no  | RECTUM                       | Yes | 2010/6/25  |
| no  | DESCENDING                   | Yes | 2010/3/1   |

| CEACAM5mRNA baseline | qPCR Cutoff_1.91 | CEACAM5 result | CEACAM5 Immunofluorescence |
|----------------------|------------------|----------------|----------------------------|
| 0                    | <1.9             | Neg            | 0                          |
| 0                    | <1.9             | Neg            | 3                          |
| 0                    | <1.9             | Neg            |                            |
| 0                    | <1.9             | Neg            | 0                          |
| 0                    | <1.9             | Neg            | 0                          |
| 0                    | <1.9             | Neg            |                            |
| 0                    | <1.9             | Neg            | 0                          |
| 0                    | <1.9             | Neg            | 0                          |
| 0                    | <1.9             | Neg            | 0                          |
| 0.93                 | <1.9             | Pos            | 0                          |
| 0                    | <1.9             | Neg            |                            |
| 0                    | <1.9             | Neg            |                            |
| 1.92                 | >=1.92           | Pos            | 0                          |
| 11.48                | >=1.92           | Pos            |                            |
| 0                    | <1.9             | Neg            | 0                          |
| 0                    | <1.9             | Neg            | 0                          |
| 0.38                 | <1.9             | Neg            | 0                          |
| 0                    | <1.9             | Neg            | 0                          |
| 0                    | <1.9             | Neg            | 0                          |
| 0.85                 | <1.9             | Pos            | 0                          |
| 6.22                 | >=1.92           | Pos            |                            |
| 6.87                 | >=1.92           | Pos            |                            |
| 0                    | <1.9             | Neg            | 0                          |
| 0                    | <1.9             | Neg            | 0                          |
| 0                    | <1.9             | Neg            | 0                          |
| 0.34                 | <1.9             | Neg            | 0                          |
| 0                    | <1.9             | Neg            | 0                          |
| 0.41                 | <1.9             | Neg            | 0                          |
| 0                    | <1.9             | Neg            | 0                          |
| 0                    | <1.9             | Neg            |                            |
| 1.93                 | >=1.92           | Pos            |                            |
| 0                    | <1.9             | Neg            | 0                          |
| 1.2                  | <1.9             | Pos            |                            |
| 0                    | <1.9             | Neg            | 0                          |
| 0                    | <1.9             | Neg            | 0                          |
| 0                    | <1.9             | Neg            | 0                          |
| 0                    | <1.9             | Neg            | 0                          |
| 0                    | <1.9             | Neg            |                            |
| 0                    | <1.9             | Neg            |                            |
| 0                    | <1.9             | Neg            | 0                          |
| 0                    | <1.9             | Neg            | 0                          |
| 0.79                 | <1.9             | Pos            | 0                          |
| 0                    | <1.9             | Neg            | 0                          |
| 0.16                 | <1.9             | Neg            | 0                          |
| 0                    | <1.9             | Neg            | 0                          |
| 0                    | <1.9             | Neg            |                            |
| 0                    | <1.9             | Neg            | 0                          |
| 2.67                 | >=1.92           | Pos            | 0                          |

|       |        |     |    |
|-------|--------|-----|----|
| 0     | <1.9   | Neg | 0  |
| 0     | <1.9   | Neg | 0  |
| 0     | <1.9   | Neg | 0  |
| 0     | <1.9   | Neg | 0  |
| 0.98  | <1.9   | Pos | 1  |
| 0     | <1.9   | Neg |    |
| 0     | <1.9   | Neg |    |
| 0     | <1.9   | Neg | 0  |
| 0     | <1.9   | Neg | 0  |
| 2.1   | >=1.92 | Pos | 0  |
| 0     | <1.9   | Neg | 0  |
| 0.93  | <1.9   | Pos | 1  |
| 0     | <1.9   | Neg | 0  |
| 0     | <1.9   | Neg | 0  |
| 0     | <1.9   | Neg | 0  |
| 0     | <1.9   | Neg | 0  |
| 0.83  | <1.9   | Pos | 1  |
| 71.33 | >=1.92 | Pos | 40 |
| 0     | <1.9   | Neg | 0  |
| 0     | <1.9   | Neg | 0  |
| 0     | <1.9   | Neg | 0  |
| 0     | <1.9   | Neg |    |
| 0     | <1.9   | Neg | 0  |
| 0     | <1.9   | Neg |    |
| 2.02  | >=1.92 | Pos | 0  |
| 0.69  | <1.9   | Neg |    |
| 1.09  | <1.9   | Pos | 0  |
| 0     | <1.9   | Neg | 0  |
| 0     | <1.9   | Neg | 0  |
| 0     | <1.9   | Neg | 0  |
| 2.39  | >=1.92 | Pos |    |
| 0     | <1.9   | Neg |    |
| 0     | <1.9   | Neg | 0  |
| 0     | <1.9   | Neg | 0  |
| 0     | <1.9   | Neg | 0  |
| 0     | <1.9   | Neg | 0  |
| 0     | <1.9   | Neg | 0  |
| 0     | <1.9   | Neg |    |
| 1.14  | <1.9   | Pos | 1  |
| 0     | <1.9   | Neg | 0  |
| 0     | <1.9   | Neg | 0  |
| 0     | <1.9   | Neg | 0  |
| 0.7   | <1.9   | Neg |    |
| 0.65  | <1.9   | Neg |    |
| 1.8   | <1.9   | Pos | 2  |
| 0.86  | <1.9   | Pos | 1  |
| 0     | <1.9   | Neg |    |
| 0.71  | <1.9   | Pos |    |
| 0     | <1.9   | Neg | 0  |
| 0     | <1.9   | Neg | 0  |



|      |        |     |   |
|------|--------|-----|---|
| 0    | <1.9   | Neg | 0 |
| 0    | <1.9   | Neg | 0 |
| 0    | <1.9   | Neg | 0 |
| 0    | <1.9   | Neg | 0 |
| 0    | <1.9   | Neg | 0 |
| 0    | <1.9   | Neg | 0 |
| 0    | <1.9   | Neg | 0 |
| 0    | <1.9   | Neg | 0 |
| 0    | <1.9   | Neg | 0 |
| 0    | <1.9   | Neg | 0 |
| 0    | <1.9   | Neg | 0 |
| 0    | <1.9   | Neg | 0 |
| 3.52 | >=1.92 | Pos | 0 |
| 0    | <1.9   | Neg | 0 |
| 0    | <1.9   | Neg | 0 |
| 0    | <1.9   | Neg | 0 |
| 0.33 | <1.9   | Neg | 0 |
| 0    | <1.9   | Neg | 0 |
| 0    | <1.9   | Neg | 0 |
| 0.8  | <1.9   | Pos | 0 |
| 0    | <1.9   | Neg | 0 |
| 0    | <1.9   | Neg | 0 |
| 0    | <1.9   | Neg | 0 |
| 0.85 | <1.9   | Pos | 0 |
| 1.06 | <1.9   | Pos | 0 |
| 0    | <1.9   | Neg | 0 |
| 0    | <1.9   | Neg | 0 |
| 0.68 | <1.9   | Neg | 0 |
| 0    | <1.9   | Neg | 0 |
| 0    | <1.9   | Neg | 0 |
| 0.76 | <1.9   | Pos | 0 |
| 0.78 | <1.9   | Pos | 2 |
| 0    | <1.9   | Neg | 0 |
| 1.8  | <1.9   | Pos | 2 |
| 0    | <1.9   | Neg | 0 |
| 0    | <1.9   | Neg | 0 |
| 1.23 | <1.9   | Pos | 1 |
| 2.1  | >=1.92 | Pos | 0 |
| 0    | <1.9   | Neg | 0 |
| 2    | >=1.92 | Pos | 0 |
| 0    | <1.9   | Neg | 0 |
| 0.92 | <1.9   | Pos | 0 |
| 0.54 | <1.9   | Neg | 0 |
| 0    | <1.9   | Neg | 0 |
| 0    | <1.9   | Neg | 0 |
| 0    | <1.9   | Neg | 0 |
| 8.19 | >=1.92 | Pos | 0 |
| 0    | <1.9   | Neg | 0 |
| 1    | <1.9   | Pos | 0 |
| 0    | <1.9   | Neg | 0 |



| <b>Response</b> | <b>Relapse</b> | <b>Relapse_D</b> | <b>PFS</b> | <b>survival_date</b> | <b>Status</b> | <b>OS</b> |
|-----------------|----------------|------------------|------------|----------------------|---------------|-----------|
| PD              | Yes            | 2011/3/31        | 3.3        | 2011/10/1            | Dead          | 9.3       |
| Unknown         | Yes            | 2012/3/5         | 22.6       | 2015/4/28            | Alive         | 60.4      |
| PD              | Yes            | 2013/9/10        | 5.5        | 2014/8/22            | Dead          | 16.9      |
| PD              | Yes            | 2011/9/7         | 3.4        | 2011/9/7             | Dead          | 3.4       |
| PR              | Yes            | 2013/9/23        | 14.2       | 2014/3/7             | Dead          | 19.6      |
| SD              | Yes            | 2013/8/12        | 5.7        | 2014/8/15            | Dead          | 17.8      |
| PD              | Yes            | 2013/2/25        | 5.5        | 2013/9/4             | Dead          | 11.8      |
| SD              | Yes            | 2009/9/14        | 12.2       | 2011/10/27           | Dead          | 37.6      |
| SD              | Yes            | 2008/12/30       | 12.4       | 2011/12/1            | Dead          | 47.4      |
| PR              | Yes            | 2011/3/8         | 14.5       | 2012/3/1             | Dead          | 26.3      |
| PD              | Yes            | 2014/2/28        | 2.6        | 2014/9/17            | Dead          | 9.2       |
| SD              | Yes            | 2014/6/23        | 10.6       | 2014/12/31           | Alive         | 16.9      |
| SD              | Yes            | 2008/8/8         | 7.6        | 2010/7/22            | Dead          | 31        |
| PD              | Yes            | 2008/9/2         | 0.9        | 2008/9/22            | Dead          | 1.6       |
| PR              | Yes            | 2010/7/30        | 13.2       | 2014/5/30            | Dead          | 59.2      |
| PR              | Yes            | 2010/7/12        | 16.7       | 2013/11/10           | Dead          | 56.6      |
| PR              | Yes            | 2013/2/24        | 5          | 2013/2/24            | Dead          | 5         |
| PD              | Yes            | 2012/9/5         | 1.9        | 2012/9/6             | Dead          | 1.9       |
| PR              | Yes            | 2015/2/2         | 49.2       | 2015/2/2             | Alive         | 49.2      |
| PR              | Yes            | 2013/12/19       | 26.9       | 2015/5/4             | Alive         | 43.4      |
| PD              | Yes            | 2012/2/29        | 0.5        | 2012/2/29            | Dead          | 0.5       |
| PD              | Yes            | 2007/12/14       | 1.7        | 2008/4/13            | Dead          | 5.7       |
| PD              | Yes            | 2008/2/21        | 2.9        | 2009/6/24            | Dead          | 18.9      |
| PD              | Yes            | 2009/3/10        | 0.9        | 2009/4/15            | Dead          | 2.1       |
| PD              | Yes            | 2010/2/1         | 0.7        | 2010/2/1             | Dead          | 0.7       |
| SD              | Yes            | 2010/2/25        | 12.5       | 2013/6/11            | Dead          | 51.9      |
| PR              | Yes            | 2013/6/3         | 11.5       | 2015/3/19            | Alive         | 33        |
| PD              | Yes            | 2011/7/14        | 3.5        | 2012/4/30            | Dead          | 13        |
| PD              | Yes            | 2011/6/7         | 2.5        | 2011/6/21            | Dead          | 3         |
| PR              | Yes            | 2014/4/7         | 15.3       | 2015/3/4             | Alive         | 26.2      |
| SD              | Yes            | 2014/4/8         | 8.8        | 2015/1/10            | Dead          | 17.9      |
| PD              | Yes            | 2008/4/8         | 1.6        | 2008/5/1             | Dead          | 2.3       |
| SD              | Yes            | 2011/9/15        | 13.6       | 2012/9/19            | Dead          | 25.8      |
| PD              | Yes            | 2012/10/8        | 2.2        | 2013/1/1             | Dead          | 5         |
| SD              | Yes            | 2010/11/10       | 12.5       | 2012/3/9             | Dead          | 28.4      |
| PD              | Yes            | 2009/9/1         | 2.2        | 2009/9/1             | Dead          | 2.2       |
| SD              | Yes            | 2010/4/28        | 10.5       | 2010/4/28            | Dead          | 10.5      |
| Unknown         | Yes            | 2009/1/12        | 7.5        | 2010/2/9             | Dead          | 20.4      |
| SD              | Yes            | 2003/6/12        | 9.5        | 2003/8/11            | Dead          | 11.5      |
| Unknown         | No             |                  | 81.9       | 2015/1/9             | Alive         | 81.9      |
| PR              | No             |                  | 64         | 2015/2/18            | Alive         | 64        |
| PD              | Yes            | 2010/10/18       | 3.2        | 2011/11/8            | Dead          | 15.9      |
| CR              | Yes            | 2012/10/30       | 11.8       | 2015/5/11            | Alive         | 42.1      |
| PR              | Yes            | 2011/6/22        | 8.9        | 2012/5/31            | Dead          | 20.2      |
| PR              | Yes            | 2012/4/3         | 7.7        | 2012/10/1            | Dead          | 13.7      |
| SD              | Yes            | 2013/2/1         | 10.8       | 2014/4/10            | Dead          | 25        |
| PR              | Yes            | 2013/9/3         | 9.6        | 2015/4/20            | Alive         | 29.1      |
| PR              | Yes            | 2010/12/2        | 8.8        | 2013/3/15            | Dead          | 36.2      |
| PR              | Yes            | 2008/12/1        | 10.1       | 2009/6/1             | Dead          | 16        |

|    |     |            |      |            |       |      |
|----|-----|------------|------|------------|-------|------|
| PR | Yes | 2015/5/13  | 34.6 | 2015/5/13  | Dead  | 34.6 |
| PR | Yes | 2013/9/4   | 10.8 | 2014/1/15  | Dead  | 15.2 |
| PR | Yes | 2011/5/16  | 11   | 2011/7/6   | Dead  | 12.6 |
| PR | Yes | 2012/4/23  | 8.4  | 2012/6/1   | Dead  | 9.7  |
| PD | Yes | 2011/11/6  | 1.5  | 2011/12/31 | Dead  | 1.5  |
| SD | Yes | 2013/10/25 | 7.6  | 2015/4/30  | Alive | 25.7 |
| PR | No  |            | 6.9  | 2014/1/8   | Dead  | 6.9  |
| PR | Yes | 2012/6/5   | 9.8  | 2012/11/12 | Dead  | 15.1 |
| PD | Yes | 2009/6/26  | 4.9  | 2009/7/21  | Dead  | 5.7  |
| PR | Yes | 2008/9/3   | 8.5  | 2008/10/10 | Dead  | 9.7  |
| SD | Yes | 2011/2/23  | 10   | 2013/4/16  | Dead  | 35.7 |
| PD | Yes | 2006/7/20  | 2.8  | 2007/7/28  | Dead  | 15   |
| PD | Yes | 2010/2/18  | 3.3  | 2011/8/30  | Dead  | 21.6 |
| SD | Yes | 2007/12/4  | 3.7  | 2008/4/2   | Dead  | 7.6  |
| PD | Yes | 2011/6/26  | 0.8  | 2011/6/26  | Dead  | 0.8  |
| PR | Yes | 2011/10/20 | 16.9 | 2012/8/6   | Dead  | 26.4 |
| PR | Yes | 2008/3/17  | 9    | 2010/7/7   | Dead  | 36.6 |
| SD | Yes | 2012/12/28 | 14.2 | 2013/6/15  | Dead  | 19.7 |
| SD | Yes | 2015/5/7   | 50.4 | 2015/5/7   | Alive | 50.4 |
| SD | Yes | 2011/2/1   | 9    | 2013/7/11  | Dead  | 38.2 |
| PR | Yes | 2011/9/6   | 11.7 | 2014/1/31  | Dead  | 40.5 |
| PR | Yes | 2011/6/16  | 10.4 | 2011/12/5  | Dead  | 16.1 |
| SD | Yes | 2012/10/9  | 15.7 | 2015/5/4   | Alive | 46.5 |
| SD | Yes | 2009/9/21  | 14.9 | 2010/3/23  | Dead  | 20.9 |
| PD | Yes | 2008/7/31  | 1.8  | 2009/5/12  | Dead  | 11.2 |
| SD | Yes | 2015/1/29  | 23.2 | 2015/5/6   | Alive | 26.4 |
| SD | Yes | 2008/11/20 | 10.8 | 2009/12/17 | Dead  | 23.7 |
| PR | Yes | 2011/10/19 | 8.5  | 2012/3/20  | Dead  | 13.5 |
| PD | Yes | 2007/11/21 | 0.7  | 2007/11/22 | Dead  | 0.8  |
| PD | Yes | 2009/10/29 | 2.3  | 2009/11/22 | Dead  | 3.1  |
| PR | Yes | 2013/8/30  | 7    | 2015/1/27  | Dead  | 23.9 |
| PR | Yes | 2013/11/15 | 12.3 | 2014/7/16  | Dead  | 20.3 |
| SD | Yes | 2008/10/6  | 7    | 2009/5/27  | Dead  | 14.7 |
| SD | Yes | 2008/8/26  | 2.9  | 2008/9/21  | Dead  | 3.7  |
| PR | Yes | 2010/7/23  | 9.8  | 2012/6/25  | Dead  | 32.9 |
| SD | Yes | 2010/4/6   | 7.1  | 2010/4/6   | Dead  | 7.1  |
| PR | Yes | 2009/12/21 | 2.6  | 2009/12/21 | Dead  | 2.6  |
| PR | Yes | 2013/7/1   | 8.2  | 2015/5/7   | Alive | 30.4 |
| PR | Yes | 2013/4/15  | 25.5 | 2013/8/17  | Dead  | 29.6 |
| PD | Yes | 2011/10/17 | 1    | 2011/10/17 | Dead  | 1    |
| SD | Yes | 2015/2/12  | 22.7 | 2015/4/1   | Alive | 24.3 |
| PR | Yes | 2010/3/16  | 8.3  | 2011/2/2   | Dead  | 18.9 |
| PR | Yes | 2014/2/20  | 6.5  | 2015/4/30  | Alive | 20.8 |
| PR | Yes | 2010/12/29 | 5.8  | 2010/12/31 | Dead  | 5.9  |
| PR | Yes | 2012/7/3   | 10.9 | 2012/7/14  | Dead  | 11.3 |
| PD | Yes | 2009/3/3   | 0.9  | 2009/3/3   | Dead  | 0.9  |
| SD | Yes | 2011/3/16  | 6.5  | 2011/7/12  | Dead  | 10.4 |
| SD | Yes | 2014/10/6  | 10.3 | 2014/10/22 | Dead  | 10.9 |
| PR | Yes | 2010/9/14  | 9.6  | 2014/12/13 | Dead  | 60.6 |
| PD | Yes | 2009/1/14  | 0.9  | 2009/1/14  | Dead  | 0.9  |

|         |     |            |      |            |       |      |
|---------|-----|------------|------|------------|-------|------|
| PR      | Yes | 2010/6/15  | 17.8 | 2011/11/14 | Dead  | 34.8 |
| PD      | Yes | 2012/3/29  | 1.6  | 2012/8/28  | Dead  | 6.6  |
| PD      | Yes | 2007/10/18 | 3    | 2008/8/20  | Dead  | 13   |
| Unknown | No  | 2013/7/8   | 32.4 | 2015/5/11  | Alive | 54.5 |
| PR      | Yes | 2011/7/7   | 9.1  | 2013/5/29  | Dead  | 31.8 |
| PR      | No  |            | 77.2 | 2015/3/6   | Alive | 77.2 |
| PR      | Yes | 2009/4/10  | 6    | 2009/7/21  | Dead  | 9.3  |
| PR      | Yes | 2013/6/3   | 8.3  | 2014/10/5  | Dead  | 24.3 |
| PD      | Yes | 2009/3/24  | 2.8  | 2010/2/16  | Dead  | 13.6 |
| PD      | Yes | 2010/8/2   | 2.8  | 2010/10/12 | Dead  | 5.1  |
| SD      | Yes | 2009/5/6   | 4.5  | 2013/12/19 | Dead  | 60   |
| PR      | Yes | 2010/7/20  | 8.8  | 2011/10/21 | Dead  | 23.8 |
| PD      | Yes | 2010/11/4  | 2.6  | 2012/7/28  | Dead  | 23.4 |
| SD      | Yes | 2011/4/13  | 6.5  | 2011/12/21 | Dead  | 14.8 |
| PR      | Yes | 2011/10/6  | 25.9 | 2013/7/26  | Dead  | 47.5 |
| SD      | Yes | 2012/12/12 | 14   | 2014/11/13 | Dead  | 37.1 |
| SD      | Yes | 2011/8/17  | 3.3  | 2011/8/17  | Dead  | 3.3  |
| PD      | Yes | 2008/5/5   | 1.9  | 2008/11/6  | Dead  | 8    |
| PR      | Yes | 2010/10/4  | 11.6 | 2011/8/12  | Dead  | 21.8 |
| SD      | Yes | 2012/9/10  | 5.7  | 2013/9/15  | Dead  | 17.9 |
| PR      | Yes | 2012/5/9   | 10.1 | 2012/11/28 | Dead  | 16.8 |
| PD      | Yes | 2010/10/22 | 2.4  | 2015/3/4   | Alive | 54.8 |
| SD      | Yes | 2008/2/29  | 6.5  | 2008/4/28  | Dead  | 8.5  |
| PD      | Yes | 2011/1/10  | 0.9  | 2011/1/10  | Dead  | 0.9  |
| PD      | Yes | 2009/3/29  | 0.2  | 2009/3/29  | Dead  | 0.2  |
| PD      | Yes | 2012/10/25 | 2.6  | 2012/12/24 | Dead  | 4.5  |
| PD      | Yes | 2012/2/12  | 11.7 | 2012/2/12  | Dead  | 11.7 |
| PR      | Yes | 2013/2/12  | 15.8 | 2014/11/12 | Dead  | 36.8 |
| PR      | Yes | 2010/3/24  | 11.6 | 2014/12/11 | Alive | 68.2 |
| PR      | Yes | 2010/1/29  | 10.4 | 2012/10/2  | Dead  | 42.5 |
| SD      | Yes | 2009/5/20  | 15.9 | 2013/5/4   | Dead  | 63.3 |
| PR      | Yes | 2009/12/28 | 7.5  | 2010/7/10  | Dead  | 13.9 |
| PD      | Yes | 2008/7/30  | 4.9  | 2009/3/6   | Dead  | 12.1 |
| PR      | Yes | 2012/11/21 | 10.4 | 2015/5/12  | Alive | 40   |
| PR      | Yes | 2011/9/2   | 9.2  | 2012/1/27  | Dead  | 14   |
| PR      | Yes | 2001/8/21  | 11.1 | 2001/11/4  | Dead  | 13.5 |
| PR      | Yes | 2013/1/14  | 7.8  | 2013/4/27  | Dead  | 11.1 |
| PR      | Yes | 2011/5/17  | 8.5  | 2013/2/4   | Dead  | 29.2 |
| PR      | Yes | 2013/9/10  | 11.1 | 2014/2/11  | Dead  | 16.1 |
| PD      | Yes | 2012/7/24  | 1.6  | 2012/8/26  | Dead  | 2.7  |
| CR      | Yes | 2014/11/26 | 33.8 | 2015/3/12  | Alive | 37.3 |
| PD      | Yes | 2013/1/22  | 3    | 2014/3/15  | Dead  | 16.7 |
| PD      | Yes | 2011/11/23 | 2.9  | 2012/1/15  | Dead  | 4.7  |
| PR      | Yes | 2015/3/2   | 24.1 | 2015/5/14  | Alive | 26.5 |
| SD      | Yes | 2014/7/31  | 12.3 | 2015/5/5   | Alive | 21.4 |
| PR      | Yes | 2011/1/25  | 7.4  | 2012/5/1   | Dead  | 22.6 |
| PR      | Yes | 2013/2/25  | 14.7 | 2014/11/27 | Dead  | 35.7 |
| SD      | Yes | 2010/9/30  | 5.1  | 2012/3/10  | Dead  | 22.4 |
| PD      | Yes | 2010/1/23  | 1.8  | 2010/1/23  | Dead  | 1.8  |
| PR      | Yes | 2013/7/5   | 14.1 | 2014/12/8  | Dead  | 31.2 |

|    |     |            |      |            |       |      |
|----|-----|------------|------|------------|-------|------|
| CR | Yes | 2013/3/31  | 3.4  | 2013/3/31  | Dead  | 3.4  |
| PR | Yes | 2012/3/6   | 6.1  | 2012/11/1  | Dead  | 14   |
| PR | Yes | 2009/10/12 | 6.7  | 2013/1/28  | Dead  | 46.2 |
| SD | Yes | 2010/7/22  | 4    | 2012/1/19  | Dead  | 21.9 |
| PD | Yes | 2010/7/4   | 3.2  | 2010/7/16  | Dead  | 3.5  |
| PD | Yes | 2012/1/5   | 1.8  | 2012/5/28  | Dead  | 6.6  |
| PR | Yes | 2014/3/9   | 9.6  | 2015/3/1   | Alive | 21.4 |
| PR | Yes | 2012/9/26  | 13.5 | 2015/5/6   | Alive | 44.8 |
| PR | Yes | 2008/4/17  | 3.3  | 2009/10/8  | Dead  | 21   |
| PR | Yes | 2008/3/20  | 8.3  | 2008/10/15 | Dead  | 15.2 |
| PR | Yes | 2010/3/15  | 8    | 2011/1/31  | Dead  | 18.6 |
| PD | Yes | 2013/4/12  | 4.5  | 2013/11/1  | Dead  | 11.2 |
| PD | Yes | 2009/4/23  | 1.2  | 2009/4/23  | Dead  | 1.2  |
| PD | Yes | 2012/1/21  | 3.5  | 2012/3/2   | Dead  | 4.9  |
| PD | Yes | 2010/10/14 | 7.7  | 2010/12/9  | Dead  | 9.5  |
| SD | Yes | 2012/6/28  | 8.3  | 2015/1/7   | Dead  | 38.6 |
| PD | Yes | 2009/8/30  | 1.7  | 2009/8/30  | Dead  | 1.7  |
| PR | Yes | 2009/5/4   | 18.1 | 2010/12/2  | Dead  | 37.1 |
| PD | Yes | 2008/1/29  | 2.1  | 2008/3/17  | Dead  | 3.7  |
| SD | Yes | 2013/8/9   | 13.2 | 2015/5/11  | Alive | 34.2 |
| PR | Yes | 2011/8/11  | 8.7  | 2012/6/14  | Dead  | 18.9 |
| PR | Yes | 2011/6/28  | 12.2 | 2013/3/20  | Dead  | 33   |
| SD | Yes | 2011/8/9   | 15.9 | 2011/8/24  | Dead  | 16.4 |
| PD | Yes | 2013/12/16 | 5.5  | 2013/12/16 | Dead  | 5.5  |
| SD | Yes | 2012/1/27  | 12   | 2013/11/16 | Dead  | 33.6 |
| SD | Yes | 2010/1/21  | 13.5 | 2012/5/6   | Dead  | 41   |
| PR | Yes | 2014/6/17  | 8.7  | 2014/10/21 | Dead  | 12.8 |
| PR | Yes | 2010/6/21  | 6.4  | 2010/7/25  | Dead  | 7.6  |
| PR | Yes | 2009/8/18  | 5.7  | 2011/12/5  | Dead  | 33.2 |
| PD | Yes | 2012/9/24  | 7.7  | 2012/9/24  | Dead  | 7.7  |
| PR | Yes | 2009/9/1   | 9.8  | 2011/5/4   | Dead  | 29.9 |
| PR | Yes | 2014/10/31 | 27.3 | 2015/5/15  | Alive | 33.7 |
| CR | No  |            | 55.7 | 2015/5/14  | Alive | 55.7 |
| PR | Yes | 2014/9/11  | 15   | 2015/4/13  | Dead  | 22   |
| PR | Yes | 2009/2/11  | 7.8  | 2010/3/24  | Dead  | 21.1 |
| PR | Yes | 2011/11/16 | 9.5  | 2015/4/28  | Alive | 50.8 |
|    | Yes | 2015/2/18  | 13.7 | 2015/2/18  | Alive | 13.7 |
| PR | Yes | 2011/1/24  | 6.5  | 2012/6/20  | Dead  | 23.4 |
| PR | Yes | 2011/1/31  | 7.3  | 2013/6/25  | Dead  | 36.1 |
| PD | Yes | 2010/5/28  | 4.9  | 2010/10/21 | Dead  | 4.9  |
| PR | Yes | 2006/12/29 | 1    | 2007/12/19 | Dead  | 12.6 |
| PR | Yes | 2014/2/14  | 10.7 | 2015/1/15  | Alive | 21.7 |
| PR | Yes | 2010/11/2  | 12   | 2012/6/1   | Dead  | 30.9 |
| SD | Yes | 2012/3/9   | 7.7  | 2013/4/23  | Dead  | 21.2 |
| PD | Yes | 2012/4/6   | 1.9  | 2012/5/10  | Dead  | 3.1  |
| PD | Yes | 2012/2/3   | 0.5  | 2012/2/3   | Dead  | 0.5  |
| SD | Yes | 2008/3/26  | 6.2  | 2008/8/13  | Dead  | 10.8 |
| PD | Yes | 2010/9/14  | 2.7  | 2012/5/17  | Dead  | 22.7 |
| SD | Yes | 2012/7/23  | 28.7 | 2015/4/16  | Alive | 61.5 |
